# Supplementary material
Source: publisher site journal article supplement (https://www.dovepress.com/article/332519)
Supplement: Supplementary file 1 [file get_supplementary_file.php]

**Supplementary Table 1. DCE health states and utility examples (SG Anchoring)**

| **Mobility** | **Weakness** | **OGC** | **Feeding** | **Cognition** | **Screaming** | **U(HS)** |
| --- | --- | --- | --- | --- | --- | --- |
| 1 | 1 | 1 | 1 | 1 | 1 | 0.7093 |
| 1 | 1 | 1 | 1 | 2 | 1 | 0.7042 |
| 1 | 1 | 2 | 1 | 1 | 1 | 0.7023 |
| 1 | 1 | 1 | 1 | 1 | 2 | 0.7005 |
| 2 | 1 | 1 | 1 | 1 | 1 | 0.7004 |
| 1 | 2 | 1 | 1 | 1 | 1 | 0.6990 |
| 4 | 1 | 1 | 1 | 1 | 1 | 0.6975 |
| 3 | 1 | 1 | 1 | 1 | 1 | 0.6975 |
| 1 | 1 | 3 | 1 | 1 | 1 | 0.6939 |
| 1 | 1 | 1 | 2 | 1 | 1 | 0.6889 |
| 5 | 1 | 1 | 1 | 1 | 1 | 0.6882 |
| 1 | 3 | 1 | 1 | 1 | 1 | 0.6877 |
| 1 | 1 | 1 | 1 | 1 | 3 | 0.6863 |
| 1 | 1 | 1 | 1 | 3 | 1 | 0.6831 |
| 6 | 1 | 1 | 1 | 1 | 1 | 0.6600 |
| 6 | 3 | 3 | 2 | 3 | 3 | 0.5534 |

**Supplementary Table 2. DCE health states and utility examples (HUI3 Anchoring)***

| **Mobility** | **Weakness** | **OGC** | **Feeding** | **Cognition** | **Screaming** | **U(HS)** |
| --- | --- | --- | --- | --- | --- | --- |
| 1 | 1 | 1 | 1 | 1 | 1 | 0.7093 |
| 1 | 1 | 1 | 1 | 2 | 1 | 0.7022 |
| 1 | 1 | 2 | 1 | 1 | 1 | 0.6996 |
| 1 | 1 | 1 | 1 | 1 | 2 | 0.6970 |
| 2 | 1 | 1 | 1 | 1 | 1 | 0.6969 |
| 1 | 2 | 1 | 1 | 1 | 1 | 0.6949 |
| 4 | 1 | 1 | 1 | 1 | 1 | 0.6929 |
| 3 | 1 | 1 | 1 | 1 | 1 | 0.6929 |
| 1 | 1 | 3 | 1 | 1 | 1 | 0.6879 |
| 1 | 1 | 1 | 2 | 1 | 1 | 0.6809 |
| 5 | 1 | 1 | 1 | 1 | 1 | 0.6800 |
| 1 | 3 | 1 | 1 | 1 | 1 | 0.6792 |
| 1 | 1 | 1 | 1 | 1 | 3 | 0.6774 |
| 1 | 1 | 1 | 1 | 3 | 1 | 0.6728 |
| 6 | 1 | 1 | 1 | 1 | 1 | 0.6407 |
| 6 | 3 | 3 | 2 | 3 | 3 | 0.4924 |

*SG Congruent responders using the HUI3 utility value from the “bedridden” health state as the low anchor and the SG utility value from the “walking with assistance” health state as the upper anchor.
